# Supplementary material for: hESC-derived Olig2+ progenitors generate a subtype of astroglia with protective effects against ischaemic brain injury
Source: PubMed Central journal article supplement — Nat Commun. 2013 Jul 23;4:2196. doi: 10.1038/ncomms3196 (PMC3903179; doi:10.1038/ncomms3196), 2013-07-23
Supplement: ncomms3196-s1.pdf [file ncomms3196-s1.pdf]

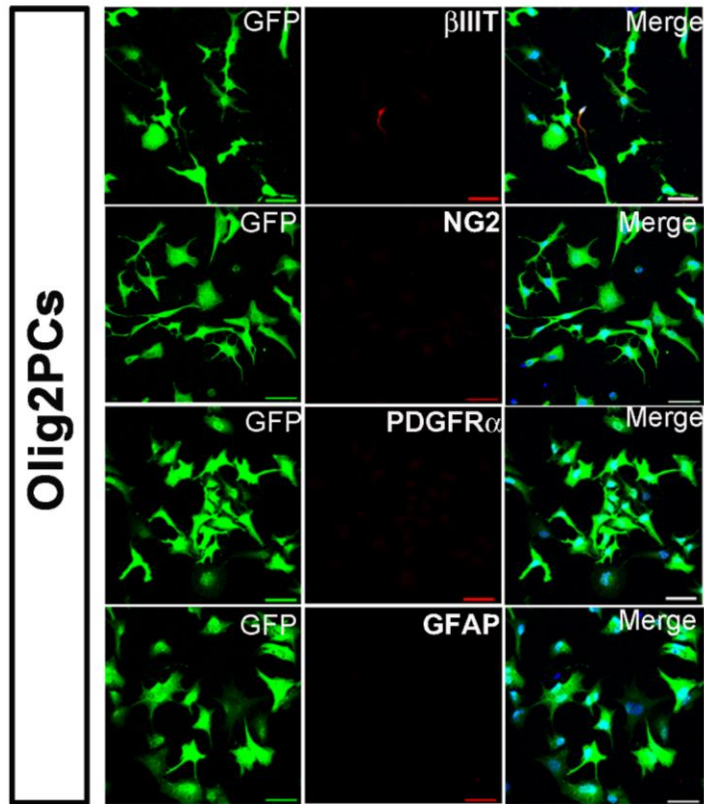

**Supplementary Fig S1. The marker expression of Olig2PCs.** Representatives showing that, 2 days after FACS purification, Olig2PCs are negative for GFAP and PDGFR $\alpha$  staining. Very few neurons are identified by  $\beta$ III-tubulin staining. Blue, DAPI-stained nuclei. Scale bars represent 50  $\mu$ m.

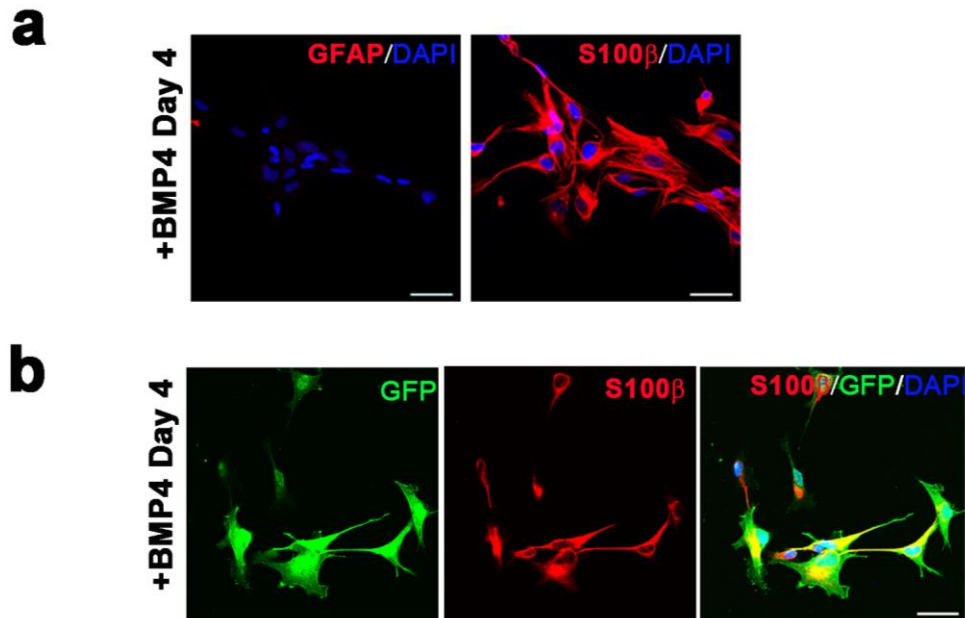

**Supplementary Fig S2. BMP4-induced differentiation of Olig2PCs to astroglia.** Representatives showing that, cultured in the presence of BMP4 for 4 days, Olig2PCs start to express S100 $\beta$  but not GFAP (a). At this time point, GFP expression can be highlighted using anti-GFP staining and GFP staining overlaps with S100 $\beta$  staining (b). Blue, DAPI-stained nuclei. Scale bars represent 50  $\mu$ m.

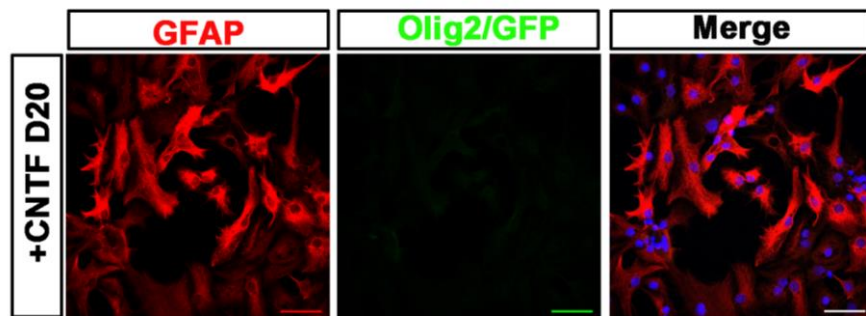

**Supplementary Fig S3. CNTF-induced differentiation of Olig2PCs to astroglia.** Representatives showing that Olig2PCs can be induced to GFAP<sup>+</sup> astroglial cells after cultured in the presence of CNTF for 20 days and these astroglial cells do not express Olig2, as indicated by the absence of the GFP fluorescence. Blue, DAPI-stained nuclei. Scale bars represent 50  $\mu$ m.

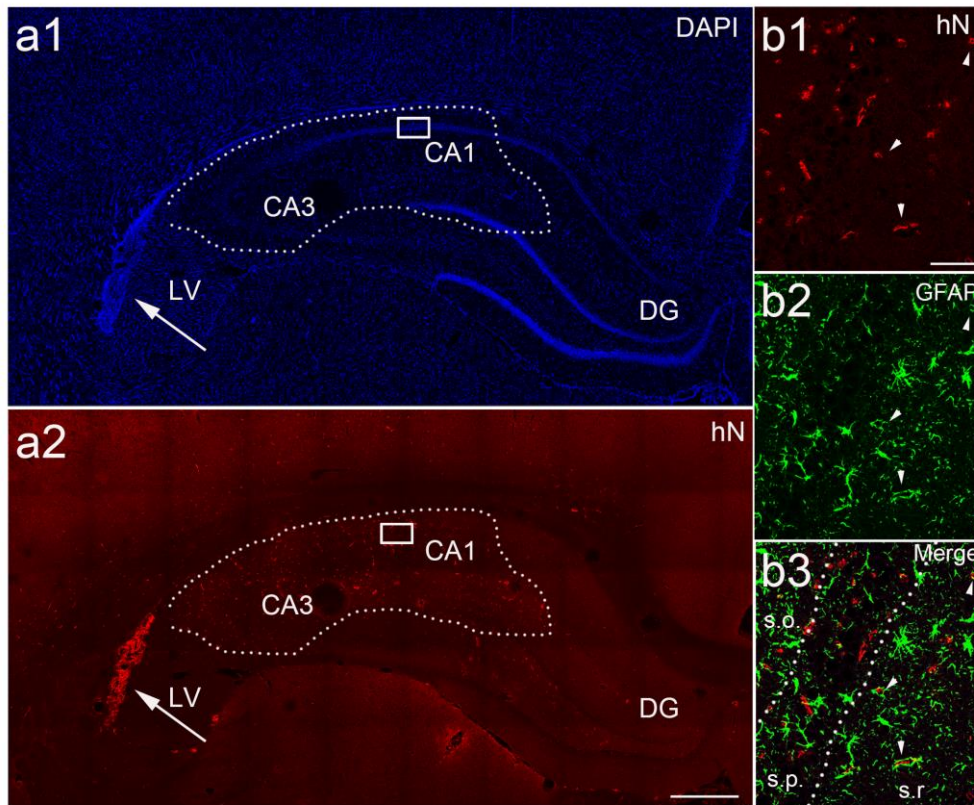

**Supplementary Fig S4. Transplantation of NPC-Astros.** DAPI (a1) and hN (a2) staining showing that there were many transplanted NPC-Astros in the LV (arrows) and the hippocampal CA1 and CA3 regions (dotted lines). Scar bar in a2 represent 100  $\mu$ m. The squared area was enlarged in b1-3. The transplanted NPC-Astros migrate into the hippocampal CA1 region (b1, hN; b2, GFAP). Arrowheads in b3 indicate the cells double labeled with hN and GFAP. Scar bar in b1 represents 50  $\mu$ m.

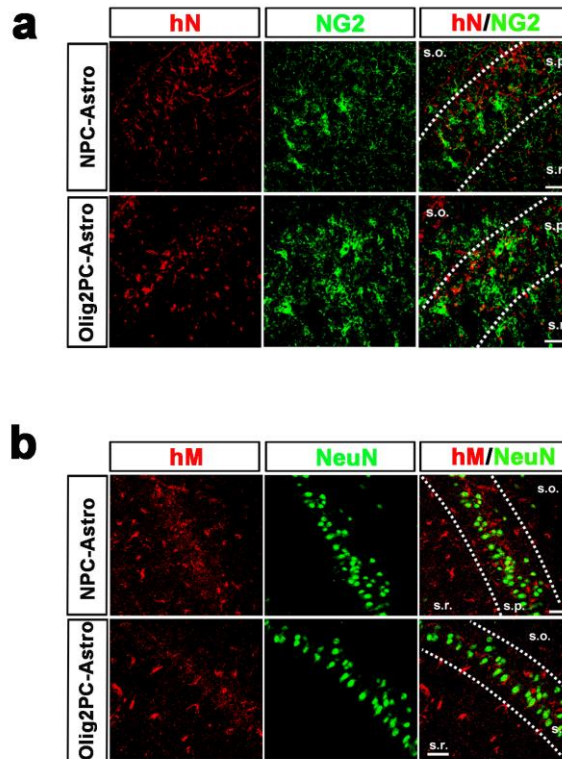

**Supplementary Fig S5. Transplanted astroglia do not generate neurons and OPCs.** Representatives showing that Olig2PC-Astros and NPC-Astros labeled by hN or hM do not express OPC marker NG2 (a) and neuronal marker NeuN (b) after transplantation. Scale bars represent 20  $\mu$ m.

**a** Olig2PC-Astros

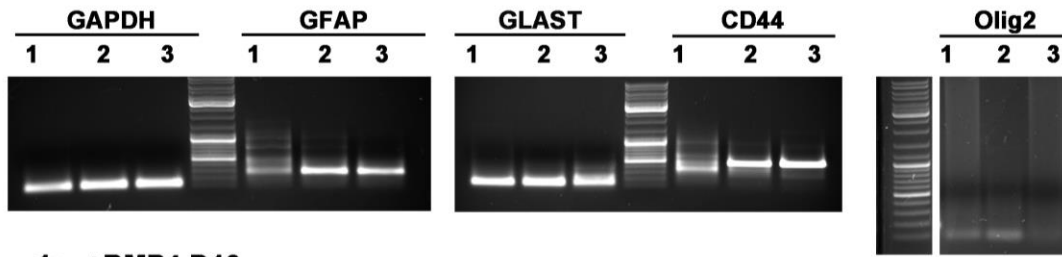

- 1: +BMP4 D10
- 2: + BMP4 D24
- 3: +BMP4 D20 +FBS D22

**b** NPC-Astros

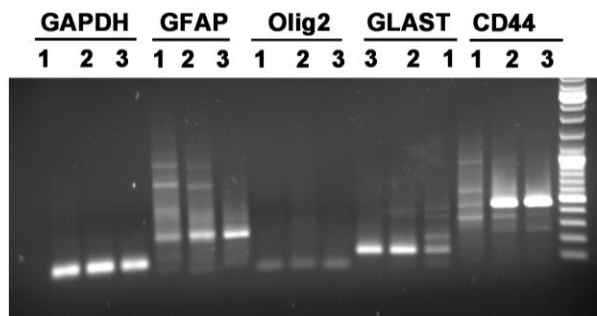

- 1: +BMP4 D10
- 2: + BMP4 D24
- 3: +BMP4 D20 +FBS D22

Supplementary Fig S6. Full gel images of RT-PCR results shown in Fig 1j and 2h.

**Supplementary Table S1.** Gene transcripts encoding secreted factors in Olig2PC-Astros relative to NPC-Astros

| Gene Symbol | RefSeq      | Fold Change (Olig2PC-Astros over NPC-Astros) | Published associations with neuroprotective effects                                                                            | Definition                                                                            |
|-------------|-------------|----------------------------------------------|--------------------------------------------------------------------------------------------------------------------------------|---------------------------------------------------------------------------------------|
| IL6         | NM_000600.1 | 21.15                                        | Hama, 1991-PMID 2027469 <sup>55</sup><br>Toulmond, 1992-PMID 1331914 <sup>56</sup><br>Loddick, 1998-PMID 9469160 <sup>57</sup> | interleukin 6 (interferon, beta 2)                                                    |
| NTS         | NM_006183.3 | 14.51                                        | Torup 2003-PMID 14623134 <sup>58</sup>                                                                                         | neurotensin                                                                           |
| CX3CL1      | NM_002996.3 | 13.36                                        | Cipriani, 2011-PMID 22072684 <sup>59</sup>                                                                                     | chemokine (C-X3-C motif) ligand 1                                                     |
| FGF13       | NM_004114.2 | 9.86                                         | Yao, 1999-PMID 9914447 <sup>60</sup>                                                                                           | fibroblast growth factor 13, transcript variant 1A.                                   |
| PDGFA       | NM_033023.3 | 7.56                                         | Andrae, 2008-PMID 18483217 <sup>61</sup>                                                                                       | platelet-derived growth factor alpha polypeptide, transcript variant 2                |
| NOG         | NM_005450.2 | 5.61                                         | Samanta, 2010-PMID 20019326 <sup>62</sup>                                                                                      | noggin                                                                                |
| TNFSF15     | NM_005118.2 | 4.13                                         |                                                                                                                                | tumor necrosis factor (ligand) superfamily, member 15                                 |
| IL6ST       | NM_002184.2 | 3.59                                         |                                                                                                                                | interleukin 6 signal transducer (gp130, oncostatin M receptor) , transcript variant 1 |
| CXCL1       | NM_001511.1 | 3.25                                         | Omari, 2009-PMID 19095949 <sup>63</sup>                                                                                        | chemokine (C-X-C motif) ligand 1 (melanoma growth stimulating activity, alpha)        |
| CXCL6       | NM_002993.2 | 2.95                                         |                                                                                                                                | chemokine (C-X-C motif) ligand 6 (granulocyte chemotactic protein 2)                  |
| THBS1       | NM_003246.2 | 2.88                                         | Liau, 2008-PMID 18594557 <sup>64</sup>                                                                                         | thrombospondin 1                                                                      |

|        |             |      |                                             |                                                         |
|--------|-------------|------|---------------------------------------------|---------------------------------------------------------|
| TGFB2  | NM_003238.1 | 2.85 | Dobolyi, 2012-PMID 22942700 <sup>65</sup>   | transforming growth factor, beta 2                      |
| CTGF   | NM_001901.1 | 2.76 |                                             | connective tissue growth factor                         |
| EDN1   | NM_001955.2 | 2.66 | Paczkowska 2013-PMID 23290569 <sup>66</sup> | endothelin 1                                            |
| WNT3   | NM_030753.4 | 2.40 | Toledo, 2008-PMID 18786602 <sup>67</sup>    | wingless-type MMTV integration site family, member 3    |
| PDGFD  | NM_025208.4 | 2.38 |                                             | platelet derived growth factor D, transcript variant 1  |
| BMP1   | NM_006131.1 | 2.22 |                                             | bone morphogenetic protein 1, transcript variant BMP1-5 |
| BMP4   | NM_001202.2 | 2.17 |                                             | bone morphogenetic protein 4 , transcript variant 3     |
| CXCL16 | NM_022059.1 | 2.04 | Rosito, 2012-PMID 22378888 <sup>68</sup>    | chemokine (C-X-C motif) ligand 16                       |
| VEGFC  | NM_005429.2 | 2.03 | Sun, 2003-PMID 12813020 <sup>69</sup>       | vascular endothelial growth factor C                    |
| BMP2   | NM_001200.1 | 2.03 |                                             | bone morphogenetic protein 2                            |
| JAG1   | NM_000214.1 | 1.97 | Kamei, 2012-PMID 22452482 <sup>70</sup>     | jagged 1 (Alagille syndrome)                            |
| BDNF   | NM_170733.2 | 1.79 | Hetman, 1999-PMID 10428835 <sup>71</sup>    | brain-derived neurotrophic factor, transcript variant 5 |
| FGF18  | NM_003862.1 | 1.67 | Ellsworth, 2003-PMID 12738892 <sup>72</sup> | fibroblast growth factor 18                             |
| PDGFC  | NM_016205.1 | 1.65 | Su, 2008-PMID 18568034 <sup>73</sup>        | platelet derived growth factor C                        |
| FGF11  | NM_004112.2 | 1.65 |                                             | fibroblast growth factor 11                             |
| GPC4   | NM_001448.2 | 1.57 |                                             | Glypican 4                                              |



|          |             |      |                                                          |                                                                                       |
|----------|-------------|------|----------------------------------------------------------|---------------------------------------------------------------------------------------|
| EDN3     | NM_207034.1 | 1.52 |                                                          | endothelin 3, transcript variant 2                                                    |
| BMP8B    | NM_001720.3 | 1.46 |                                                          | bone morphogenetic protein 8b                                                         |
| FGF5     | NM_004464.3 | 1.43 |                                                          | fibroblast growth factor 5, transcript variant 1                                      |
| GPC6     | NM_005708.2 | 1.43 |                                                          | Glypican 6                                                                            |
| TGFBRAP1 | NM_004257.3 | 1.39 |                                                          | transforming growth factor, beta receptor associated protein 1                        |
| TGFB3    | NM_003239.1 | 1.35 |                                                          | transforming growth factor, beta 3                                                    |
| FGF2     | NM_002006.3 | 1.26 | Alzheimer, 2002-PMID 12575827 <sup>74</sup>              | fibroblast growth factor 2 (basic)                                                    |
| VEGFB    | XM_938483.1 | 1.16 | Sun, 2004-PMID 15529014 <sup>75</sup>                    | vascular endothelial growth factor B                                                  |
| PTN      | NM_002825.5 | 0.82 | Kadomatsu, 2004-PMID 15013213 <sup>76</sup>              | pleiotrophin                                                                          |
| TNFSF12  | NM_003809.2 | 0.75 | Tansey and Szymkowski, 2009 -PMID 19837186 <sup>77</sup> | tumor necrosis factor (ligand) superfamily, member 12                                 |
| TNFSF14  | NM_172014.1 | 0.75 | Tansey and Szymkowski, 2009 -PMID 19837186 <sup>77</sup> | tumor necrosis factor (ligand) superfamily, member 14 (TNFSF14), transcript variant 2 |
| DKK1     | NM_012242.2 | 0.73 | Zhang, 2008-PMID 18716201 <sup>78</sup>                  | dickkopf homolog 1 (Xenopus laevis)                                                   |
| FSTL3    | NM_005860.1 | 0.72 |                                                          | folliculin-like 3 (secreted glycoprotein)                                             |
| TNFSF13B | NM_006573.3 | 0.71 | Tansey and Szymkowski, 2009 -PMID 19837186 <sup>77</sup> | tumor necrosis factor (ligand) superfamily,                                           |

|         |             |        |                                                             |                                                                                                              |
|---------|-------------|--------|-------------------------------------------------------------|--------------------------------------------------------------------------------------------------------------|
|         |             |        |                                                             | member 13b,<br>transcript variant 1                                                                          |
| TNFSF18 | NM_005092.2 | 0.70   | Tansey and Szymkowski, 2009<br>-PMID 19837186 <sup>77</sup> | tumor necrosis factor (ligand) superfamily, member 18                                                        |
| FST     | NM_006350.2 | 0.66   | Sulyok, 2004-PMID 15451577 <sup>79</sup>                    | follistatin , transcript variant FST317                                                                      |
| TNFSF4  | NM_003326.2 | 0.62   | Tansey and Szymkowski, 2009<br>-PMID 19837186 <sup>77</sup> | tumor necrosis factor (ligand) superfamily, member 4 (tax-transcriptionally activated glycoprotein 1, 34kDa) |
| WNT5A   | NM_003392.3 | 0.45   | Toledo, 2008-PMID 18786602 <sup>67</sup>                    | wingless-type MMTV integration site family, member 5A                                                        |
| WNT5B   | NM_032642.2 | 0.44   | Toledo, 2008-PMID 18786602 <sup>67</sup>                    | wingless-type MMTV integration site family, member 5B, transcript variant 1                                  |
| CXCL3   | NM_002090.2 | 0.30   |                                                             | chemokine (C-X-C motif) ligand 3                                                                             |
| THBS2   | NM_003247.2 | 0.26   | Liauw, 2008-PMID 18594557 <sup>64</sup>                     | thrombospondin 2                                                                                             |
| CXCL14  | NM_004887.3 | 0.17   |                                                             | chemokine (C-X-C motif) ligand 14                                                                            |
| CXCL12  | NM_199168.2 | 0.12   | Li and Ransohoff, 2008-PMID 18177992 <sup>80</sup>          | chemokine (C-X-C motif) ligand 12 (stromal cell-derived factor 1), transcript variant 1                      |
| CRH     | NM_000756.1 | 0.11   | Bayatti and Behl, 2005-PMID 16046283 <sup>81</sup>          | corticotropin releasing hormone                                                                              |
| PENK    | NM_006211.2 | 0.01   |                                                             | proenkephalin                                                                                                |
| NTF3    | NM_002527.3 | 0.0024 | Cheng and Mattson, 1994-PMID 7911729 <sup>82</sup>          | neurotrophin 3                                                                                               |

**Supplementary Table S2.** List of antibodies

| <b>Antibodies</b>   | <b>Vendor</b>                        | <b>Type</b> | <b>Dilution</b> |
|---------------------|--------------------------------------|-------------|-----------------|
| Pax6                | GeneTex GTX113241                    | Rbt IgG     | 1:500           |
| Human Nestin        | R&D MAB1259                          | Ms IgG      | 1:500           |
| NG2                 | Millipore AB5320                     | Rabbit IgG  | 1:200           |
| PDGFR $\alpha$      | R&D MAB322                           | Ms IgG      | 1:50            |
| MBP                 | Millipore MAB386                     | Rat IgG     | 1:100           |
| A2B5                | Millipore MAb312                     | Mouse IgM   | 1:200           |
| Synapsin-1          | Millipore MAB1543                    | Rabbit IgG  | 1:1000          |
| Olig2               | Phosphosolutions 1538                | Rabbit IgG  | 1:1000          |
| $\beta$ III tubulin | Millipore MAB1637                    | Mouse IgG   | 1:200           |
| s100 $\beta$        | Sigma S2532                          | Mouse IgG   | 1:1000          |
| GFAP                | Millipore AB5804                     | Rabbit IgG  | 1:1000          |
| Human CD44          | Abcam ab6124                         | Ms IgG      | 1:1000          |
| BDNF                | Santa Cruz Biotechnology sc-33904    | Goat IgG    | 1:50            |
| NeuN                | Millipore MAB377                     | Ms IgG      | 1:500           |
| GFP                 | Invitrogen A11122                    | Rabbit IgG  | 1:1000          |
| GFP                 | Rockland Immunochemicals 600-141-215 | Goat IgG    | 1:500           |
| Caspase 3 active    | Millipore AB3623                     | Rbt IgG     | 1:100           |
| Human nuclei        | Millipore MAB4383                    | Ms IgG      | 1:100           |
| Human mitochondria  | Millipore AB3598                     | Rbt IgG     | 1:100           |
| Vimentin            | Cell Signaling R28 #3932             | Rbt IgG     | 1:500           |

**Supplementary Table S3. PCR Primers**

| Gene       | Forward sequence            | Reverse sequence            | Length (bp)         |
|------------|-----------------------------|-----------------------------|---------------------|
| GLAST      | ATCCTTGGATTTACCCTCCGA       | CGCCATTCTGTGACAAGAC         | 141                 |
| Olig2      | CTCCTCAAATCGCATCCAG         | AAAAGGTCATCGGGCTCTG         | 144                 |
| GFAP       | AGTCCCTGGAGAGGCAGATGCGCGAGC | ATGTTCTCTTGAGGTGGCCTTCTGAC  | 313                 |
| CD44       | AGATCAGTCACAGACCTGCC        | GCAAAGTCAAGAATCAAAGCC       | 471 (standard form) |
| NFE2L2     | TGATTGACATACTTTGGAGGC       | TCTTCATCTAGTTGTAAGTACTGAGCG | 181                 |
| GCLC       | GGCACAAGGACGTTCTCAAGT       | CAAAGGGTAGGATGGTTTGGG       | 160                 |
| GDNF       | TGGGTCTGGGCTATGAAACC        | GTCTCAGCTGCATCGCAAGA        | 73                  |
| Total BDNF | CATCCGAGGACAAGGTGGCTTGG     | GTCCTCATCCAACAGCTCTTCTATC   | 148                 |
| NT-3       | ACGGTACGCGGAGCATAAGA        | CTCGGACGTAGGTTTGGGAT        | 266                 |
| TSP1       | GCTGCACTGAGTGTCACTGTC       | TCAGGAAGTGTGGCATTGG         | 91                  |
| TSP2       | GTGCAGGAGCGTCAGATGT         | GGGTTGGATAAACAGCCATC        | 62                  |
| APOE       | ACCCAGGAAGTCAAGGAC          | CTCCTTGGACAGCCGTG           | 120                 |
| APP        | GGCGGTGTTGTCATAGCGA         | TGCATCTTGGACAGGTGGC         | 137                 |
| GPC4       | CTGGAGGGTCCTTTCAACATT       | GACATCAGTAACCAGTCGGTC       | 264                 |
| GPC6       | TCCTCAGGAATATACATGCTGC      | TTCGTCAAATTTCTTATGCCTG      | 142                 |
| GAPDH      | GAGTCCACTGGCGTCTTCAC        | TTCACACCCATGACGAACAT        | 119                 |

**Supplementary Table S4. Taqman primers**

| Gene  | Gene expression assay catalog number |
|-------|--------------------------------------|
| GLAST | Hs00188193_m1                        |
| GLT-1 | Hs01102423_m1                        |
| GAPDH | Hs02758991_g1                        |

### Supplementary References:

55. Hama T., Kushima Y., Miyamoto M., Kubota M., Takei N., Hatanaka H. Interleukin-6 improves the survival of mesencephalic catecholaminergic and septal cholinergic neurons from postnatal, two-week-old rats in cultures. *Neuroscience*. **40**, 445-452 (1991).
56. Toulmond S., Vige X., Fage D., Benavides J. Local infusion of interleukin-6 attenuates the neurotoxic effects of NMDA on rat striatal cholinergic neurons. *Neurosci Lett*. **144**, 49-52 (1992).
57. Loddick S. A., Turnbull A. V., Rothwell N. J. Cerebral interleukin-6 is neuroprotective during permanent focal cerebral ischemia in the rat. *J Cereb Blood Flow Metab*. **18**, 176-179 (1998).
58. Torup L., Borsdal J., Sager T. Neuroprotective effect of the neurotensin analogue JMV-449 in a mouse model of permanent middle cerebral ischaemia. *Neurosci Lett*. **351**, 173-176 (2003).
59. Cipriani R., Villa P., Chece G., Lauro C., Paladini A., Micotti E., *et al.* CX3CL1 is neuroprotective in permanent focal cerebral ischemia in rodents. *J Neurosci*. **31**, 16327-16335 (2011).
60. Yao D. L., Masonic K., Petullo D., Li L. Y., Lincoln C., Wibberley L., *et al.* Pretreatment with intravenous FGF-13 reduces infarct volume and ameliorates neurological deficits following focal cerebral ischemia in rats. *Brain Res*. **818**, 140-146 (1999).
61. Andrae J., Gallini R., Betsholtz C. Role of platelet-derived growth factors in physiology and medicine. *Genes & development*. **22**, 1276-1312 (2008).
62. Samanta J., Alden T., Gobeske K., Kan L., Kessler J. A. Noggin protects against ischemic brain injury in rodents. *Stroke*. **41**, 357-362 (2010).
63. Omari K. M., Lutz S. E., Santambrogio L., Lira S. A., Raine C. S. Neuroprotection and remyelination after autoimmune demyelination in mice that inducibly overexpress CXCL1. *The American journal of pathology*. **174**, 164-176 (2009).
64. Liauw J., Hoang S., Choi M., Eroglu C., Choi M., Sun G. H., *et al.* Thrombospondins 1 and 2 are necessary for synaptic plasticity and functional recovery after stroke. *J Cereb Blood Flow Metab*. **28**, 1722-1732 (2008).
65. Dobolyi A., Vincze C., Pal G., Lovas G. The neuroprotective functions of transforming growth factor Beta proteins. *International journal of molecular sciences*. **13**, 8219-8258 (2012).

66. Paczkowska E., Golab-Janowska M., Bajer-Czajkowska A., Machalinska A., Ustianowski P., Rybicka M., *et al.* Increased circulating endothelial progenitor cells in patients with haemorrhagic and ischaemic stroke: the role of Endothelin-1. *Journal of the neurological sciences*. **325**, 90-99 (2013).
67. Toledo E. M., Colombres M., Inestrosa N. C. Wnt signaling in neuroprotection and stem cell differentiation. *Progress in neurobiology*. **86**, 281-296 (2008).
68. Rosito M., Deflorio C., Limatola C., Trettel F. CXCL16 orchestrates adenosine A3 receptor and MCP-1/CCL2 activity to protect neurons from excitotoxic cell death in the CNS. *J Neurosci*. **32**, 3154-3163 (2012).
69. Sun Y., Jin K., Xie L., Childs J., Mao X. O., Logvinova A., *et al.* VEGF-induced neuroprotection, neurogenesis, and angiogenesis after focal cerebral ischemia. *J Clin Invest*. **111**, 1843-1851 (2003).
70. Kamei N., Kwon S. M., Ishikawa M., Ii M., Nakanishi K., Yamada K., *et al.* Endothelial progenitor cells promote astrogliosis following spinal cord injury through Jagged1-dependent Notch signaling. *Journal of neurotrauma*. **29**, 1758-1769 (2012).
71. Hetman M., Kanning K., Cavanaugh J. E., Xia Z. Neuroprotection by brain-derived neurotrophic factor is mediated by extracellular signal-regulated kinase and phosphatidylinositol 3-kinase. *J Biol Chem*. **274**, 22569-22580 (1999).
72. Ellsworth J. L., Garcia R., Yu J., Kindy M. S. Fibroblast growth factor-18 reduced infarct volumes and behavioral deficits after transient occlusion of the middle cerebral artery in rats. *Stroke*. **34**, 1507-1512 (2003).
73. Su E. J., Fredriksson L., Geyer M., Folestad E., Cale J., Andrae J., *et al.* Activation of PDGF-CC by tissue plasminogen activator impairs blood-brain barrier integrity during ischemic stroke. *Nat Med*. **14**, 731-737 (2008).
74. Alzheimer C., Werner S. Fibroblast growth factors and neuroprotection. *Advances in experimental medicine and biology*. **513**, 335-351 (2002).
75. Sun Y., Jin K., Childs J. T., Xie L., Mao X. O., Greenberg D. A. Increased severity of cerebral ischemic injury in vascular endothelial growth factor-B-deficient mice. *J Cereb Blood Flow Metab*. **24**, 1146-1152 (2004).
76. Kadomatsu K., Muramatsu T. Midkine and pleiotrophin in neural development and cancer. *Cancer letters*. **204**, 127-143 (2004).
77. Tansey M. G., Szymkowski D. E. The TNF superfamily in 2009: new pathways, new indications, and new drugs. *Drug discovery today*. **14**, 1082-1088 (2009).

78. Zhang Q. G., Wang R., Khan M., Mahesh V., Brann D. W. Role of Dickkopf-1, an antagonist of the Wnt/beta-catenin signaling pathway, in estrogen-induced neuroprotection and attenuation of tau phosphorylation. *J Neurosci.* **28**, 8430-8441 (2008).
79. Sulyok S., Wankell M., Alzheimer C., Werner S. Activin: an important regulator of wound repair, fibrosis, and neuroprotection. *Molecular and cellular endocrinology.* **225**, 127-132 (2004).
80. Li M., Ransohoff R. M. Multiple roles of chemokine CXCL12 in the central nervous system: a migration from immunology to neurobiology. *Progress in neurobiology.* **84**, 116-131 (2008).
81. Bayatti N., Behl C. The neuroprotective actions of corticotropin releasing hormone. *Ageing research reviews.* **4**, 258-270 (2005).
82. Cheng B., Mattson M. P. NT-3 and BDNF protect CNS neurons against metabolic/excitotoxic insults. *Brain Res.* **640**, 56-67 (1994).
